# Supplementary material for: Economic Evaluation of a Robotic Chemotherapy Compounding System and its Service Expansion to Network Hospitals in Thailand
Source: Research Square preprint supplement (doi:10.21203/rs.3.rs-6494959/v1), 2025-05-06
Supplement: Supplementary file 1 [file 27dff9bad3db36a3014c43ae.docx]

# Appendix: Cost Data Collection Form

Unit Cost Study of Robotic Chemotherapy Compounding at Udon Thani Cancer Hospital

This study analyzes the unit cost of robotic chemotherapy drug preparation from the provider’s perspective, aiming to determine the economic cost of service provision. It includes labor, material, and capital costs. The compounding unit is treated as the absorbing cost center. The costing method applied is the standard (conventional) costing method, using data from fiscal year 2023 (October 2022 – September 2023).

**Cost Center Classification and Analysis Approach**

Cost centers were categorized as follows:

- **Absorbing cost centers (Code: A):** Units directly involved in robotic chemotherapy compounding.
- **Transient cost centers (Code: T):** Supporting units that provide indirect services to the absorbing cost centers.

## Table 1: Assignment of Activities to Cost Centers

| Cost Center | Code |
| --- | --- |
|  |  |
|  |  |
|  |  |
|  |  |
|  |  |
|  |  |
|  |  |
|  |  |

## Labor Cost

## Data were collected from hospital payroll records and included all forms of financial compensation to personnel (salaries, wages, position allowances, overtime pay, medical benefits, child support, education subsidies, etc.). Staff members from each unit provided estimates of their work proportion allocated to robotic compounding activities, which were then multiplied by their respective remunerations.

## Table 2: Direct Labor Cost

| Cost Center | Code | Labor Cost | Work Proportion | Total Labor Cost |
| --- | --- | --- | --- | --- |
|  |  |  |  |  |
|  |  |  |  |  |
|  |  |  |  |  |
|  |  |  |  |  |
|  |  |  |  |  |
|  |  |  |  |  |
|  |  |  |  |  |
|  |  |  |  |  |
|  |  |  |  |  |
|  |  |  |  |  |

## Material cost

## Material cost was divided into two types:

## Supplies from the Procurement Division were allocated based on actual usage and annual average unit prices.

## Utilities (electricity and water) were allocated by area (m²) for electricity and by number of personnel for water.

## Chemotherapy drug costs were excluded from this analysis.

## Table 3: Direct Material Cost by Cost Center

| Cost Center | Code | Activity | Item | Material Cost |
| --- | --- | --- | --- | --- |
|  |  |  |  |  |
|  |  |  |  |  |
|  |  |  |  |  |
|  |  |  |  |  |
|  |  |  |  |  |
|  |  |  |  |  |
|  |  |  |  |  |
|  |  |  |  |  |
|  |  |  |  |  |
|  |  |  |  |  |

## Table 4: Direct Material Usage by Personnel

| Cost Center | Code | Activity | Material Item | Quantity Used |
| --- | --- | --- | --- | --- |
|  |  |  |  |  |
|  |  |  |  |  |
|  |  |  |  |  |
|  |  |  |  |  |
|  |  |  |  |  |
|  |  |  |  |  |
|  |  |  |  |  |
|  |  |  |  |  |
|  |  |  |  |  |
|  |  |  |  |  |

Capital cost

- **Building costs**, calculated using depreciation over expected useful life, adjusted for inflation.
- **Equipment costs**, calculated using annuitized depreciation, allocated according to usage proportion.

## Table 5: Building Capital Cost Calculation

| Building Name | Year Acquired | Initial Value (THB) | Useful Life (years) | Inflation Factor | Adjusted Cost | Annuity | Annual Capital Cost |
| --- | --- | --- | --- | --- | --- | --- | --- |
|  |  |  |  |  |  |  |  |
|  |  |  |  |  |  |  |  |
|  |  |  |  |  |  |  |  |
|  |  |  |  |  |  |  |  |
|  |  |  |  |  |  |  |  |

## Table 6: Space Allocation and Building Capital Cost

| Cost Center | Building Area (m²) | Proportion | Annual Capital Cost (THB) |
| --- | --- | --- | --- |
|  |  |  |  |
|  |  |  |  |
|  |  |  |  |
|  |  |  |  |
|  |  |  |  |
|  |  |  |  |
|  |  |  |  |
|  |  |  |  |

## Table 7: Equipment Capital Cost Allocation

| Cost Center | Code | Equipment Item | Year Acquired | Purchase Value | Useful Life (years) | Inflation Factor | Adjusted Cost | Annuity | Annual Capital Cost |
| --- | --- | --- | --- | --- | --- | --- | --- | --- | --- |
|  |  |  |  |  |  |  |  |  |  |
|  |  |  |  |  |  |  |  |  |  |
|  |  |  |  |  |  |  |  |  |  |
|  |  |  |  |  |  |  |  |  |  |
|  |  |  |  |  |  |  |  |  |  |
|  |  |  |  |  |  |  |  |  |  |
|  |  |  |  |  |  |  |  |  |  |
|  |  |  |  |  |  |  |  |  |  |
|  |  |  |  |  |  |  |  |  |  |
|  |  |  |  |  |  |  |  |  |  |

## Indirect cost

## Indirect costs from transient cost centers were allocated to absorbing cost centers using the direct allocation method, based on measurable service output

## Table 8: Indirect Cost Allocation Criteria

| Cost Center | Allocation Basis | Unit |
| --- | --- | --- |
|  |  |  |
|  |  |  |
|  |  |  |
|  |  |  |
|  |  |  |

## Table 9: Output from Transient Cost Centers

| Recipient Cost Center | Code | T1 | T2 | T3 |
| --- | --- | --- | --- | --- |
|  |  |  |  |  |
|  |  |  |  |  |
|  |  |  |  |  |
|  |  |  |  |  |
|  |  |  |  |  |
|  |  |  |  |  |

## Table 10: Proportional Allocation Based on Output

| Cost Center | Code | T1 | T2 | T3 |
| --- | --- | --- | --- | --- |
|  |  |  |  |  |
|  |  |  |  |  |
|  |  |  |  |  |
|  |  |  |  |  |
|  |  |  |  |  |
|  |  |  |  |  |

**Total Cost Calculation**

Total cost is the sum of **direct costs** and **allocated indirect costs**.

## Table 11: Total Cost Summary

| Cost Center | Code | Direct LC | Direct MC | Direct CC | Total Direct | Allocation Ratio | Indirect LC | Indirect MC | Indirect CC | Total Indirect | Total Cost |
| --- | --- | --- | --- | --- | --- | --- | --- | --- | --- | --- | --- |
|  |  |  |  |  |  |  |  |  |  |  |  |
|  |  |  |  |  |  |  |  |  |  |  |  |
|  |  |  |  |  |  |  |  |  |  |  |  |
|  |  |  |  |  |  |  |  |  |  |  |  |
|  |  |  |  |  |  |  |  |  |  |  |  |
|  |  |  |  |  |  |  |  |  |  |  |  |
|  |  |  |  |  |  |  |  |  |  |  |  |
|  |  |  |  |  |  |  |  |  |  |  |  |
|  |  |  |  |  |  |  |  |  |  |  |  |
|  |  |  |  |  |  |  |  |  |  |  |  |
