# Supplementary material for: Economic Evaluation of a Robotic Chemotherapy Compounding System and its Service Expansion to Network Hospitals in Thailand
Source: Research Square preprint supplement (doi:10.21203/rs.3.rs-6494959/v1), 2025-05-06
Supplement: Supplementary file 2 [file 751f8bbc0d47642e25a8669f.docx]

## Supplementary File 1 English version of the semi-structured interview guide used for data collection on clinical and operational outcomes

## Section 1: Udon Thani Cancer Hospital

1. Do you have records of the incidence of microbial contamination in infusion bags? If yes, please specify.
2. In cases where microbial contamination occurs in infusion bags, what corrective actions are taken? What is the estimated cost incurred per incident?
3. Do you have data on the incidence of preparation errors, medication residue, or failure rates in drug compounding? If yes, please specify.

- In the event of a **preparation error**, what actions are taken?
  (e.g., discard and re-compound)
  What is the estimated cost incurred per incident?

 - In the event of **medication residue**, what actions are taken?
  What is the estimated cost incurred per incident?

 - In the event of a **compounding failure**, what actions are taken?
  What is the estimated cost incurred per incident?

## Section 2: Network Hospital (Nong Bua Lamphu Hospital)

1. Regarding the previous compounding system used at Nong Bua Lamphu Hospital, is there any significant difference in the process compared to the preparation system from Udon Thani Cancer Hospital? Can the same unit cost data be applied? If not, please provide separate cost data for Nong Bua Lamphu Hospital.
2. Please provide the number of chemotherapy doses prepared by the robotic system for Nong Bua Lamphu Hospital, the price charged per dose, and the associated transportation cost.
3. After robotic compounding services were provided to Nong Bua Lamphu Hospital, did the hospital continue to compound some medications independently, or were all chemotherapy preparations handled entirely by Udon Thani Cancer Hospital?
